# Supplementary material for: Two-body dissociation of isoxazole following double photoionization – an experimental PEPIPICO and theoretical DFT and MP2 study
Source: Royal Society of Chemistry journal article supplement (doi:10.1039/d3cp03760f), 2023-01-01
Supplement: d3cp03760f5.pdf [file d3cp03760f5.pdf]

**ELECTRONIC SUPPLEMENTARY INFORMATION (ESI)**

**Two-body dissociation of isoxazole following double photoionization - an experimental PEPICO and theoretical DFT and MP2 study**

by T. J. Wasowicz, I. Dąbkowska, Antti Kivimäki, and Robert Richter

**Table S1.** Dissociation channel (DC), the electron energies (E), electron energies with zero vibration corrections (E+ZPVE), enthalpies (dH), and Gibbs free energies, including entropic factors (dG), discussed in the manuscript [in Hartrees].

| DC no. | Product | Geometry                                                                            | DFT_Eel  | DFT_ZPVE | DFT_dH   | DFT_dG   | MP2_Eel  | MP2_ZPVE | MP2_dH   | MP2_dG   |
|--------|---------|-------------------------------------------------------------------------------------|----------|----------|----------|----------|----------|----------|----------|----------|
|        | iso     | 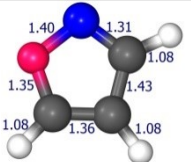   | -246.050 | -245.993 | -245.988 | -246.019 | -245.352 | -245.294 | -245.289 | -245.320 |
|        | iso_k   |   | -245.685 | -245.630 | -245.625 | -245.657 | -244.981 | -244.911 | -244.906 | -244.938 |
|        | iso_2kS |  | -245.041 | -244.989 | -244.984 | -245.015 | -244.353 | -244.299 | -244.294 | -244.325 |
|        | iso_2kT |  | -245.030 | -244.976 | -244.971 | -245.004 | -244.328 | -244.260 | -244.255 | -244.287 |

|     |            |                                                                                     |          |          |          |          |          |          |          |          |
|-----|------------|-------------------------------------------------------------------------------------|----------|----------|----------|----------|----------|----------|----------|----------|
| 1   | HCO_k1_T   | 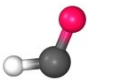   | -113.348 | -113.336 | -113.332 | -113.358 | -113.041 | -113.026 | -113.023 | -113.049 |
|     | HOC_k2_T   |    | -113.341 | -113.327 | -113.323 | -113.349 | -113.050 | -113.033 | -113.029 | -113.055 |
|     | H2C2N_k1_S |    | -131.727 | -131.696 | -131.691 | -131.720 | -131.340 | -131.307 | -131.302 | -131.331 |
|     | H2C2N_k1_T |                                                                                     | -131.660 | -131.632 | -131.627 | -131.656 | -131.251 | -131.211 | -131.206 | -131.235 |
|     | H2C2N_k2_S |    | -131.745 | -131.712 | -131.708 | -131.735 | ns       | -        | -        | -        |
|     | H2C2N_k2_T |    | ns       | -        | -        | -        | -131.208 | -131.174 | -131.169 | -131.199 |
| 2   | H2CO_k     |    | -114.111 | -114.087 | -114.083 | -114.110 | -113.791 | -113.760 | -113.756 | -113.783 |
|     | HC2N_k     |  | -131.038 | -131.021 | -131.016 | -131.045 | -130.657 | -130.626 | -130.621 | -130.649 |
| 3.1 | H2CO_k     |  | -114.111 | -114.087 | -114.083 | -114.110 | -113.791 | -113.760 | -113.756 | -113.783 |

|     |                       |                                                                                     |          |          |          |          |          |          |          |          |
|-----|-----------------------|-------------------------------------------------------------------------------------|----------|----------|----------|----------|----------|----------|----------|----------|
|     | C22HN_k               | 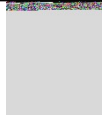    | -131.038 | -131.023 | -131.018 | -131.047 | -130.637 | -130.606 | -130.601 | -130.630 |
|     | <sup>13</sup> C2HN_k  |    | -131.038 | -131.022 | -131.016 | -131.045 | -130.637 | -130.604 | -130.599 | -130.627 |
|     | <sup>13</sup> C2HN_k2 |    | -131.038 | -131.021 | -131.016 | -131.045 | -130.637 | -130.604 | -130.599 | -130.627 |
|     | C2H15N_k              |    | -131.038 | -131.021 | -131.016 | -131.045 | -130.637 | -130.604 | -130.599 | -130.627 |
| 3.2 | HCO_k1_T              |    | -113.348 | -113.336 | -113.332 | -113.358 | -113.041 | -113.026 | -113.023 | -113.049 |
|     | H213C2N_k2_S          |    | -131.745 | -131.712 | -131.708 | -131.735 | -        | -        | -        | -        |
| 4   | CO_k                  |   | -112.795 | -112.790 | -112.786 | -112.809 | -112.526 | -112.505 | -112.502 | -112.525 |
|     | H3C2N_k1              |  | -132.326 | -132.287 | -132.281 | -132.312 | -131.915 | -131.868 | -131.864 | -131.893 |
| 5   | CN_k_S                |  | -92.161  | -92.156  | -92.153  | -92.175  | -91.974  | -91.969  | -91.965  | -91.988  |
|     | CN_k_T                |  | -92.203  | -92.199  | -92.195  | -92.219  | -91.944  | -91.931  | -91.928  | -91.951  |

|            |                                                                                   |          |          |          |          |          |          |          |          |
|------------|-----------------------------------------------------------------------------------|----------|----------|----------|----------|----------|----------|----------|----------|
| H3C2O_k1_S | 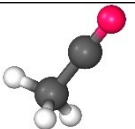  | -152.930 | -152.885 | -152.881 | -152.909 | ns       | -        | -        | -        |
| H3C2O_k1_T |  | -152.811 | -152.770 | -152.765 | -152.795 | -152.358 | -152.309 | -152.305 | -152.335 |
| H3C2O_k2_S |  | -152.930 | -152.885 | -152.881 | -152.909 | ns       | -        | -        | -        |
| H3C2O_k2_T |  | -152.736 | -152.698 | -152.694 | -152.723 | -152.275 | -152.232 | -152.228 | -152.257 |

iso - a canonical form of neutral isoxazole; k - denotes a cation, and the digit next to k is the number of successive geometry. S is a singlet, and T is a triplet. C - carbon, N - nitrogen, O - oxygen, and H - hydrogen; "ns" stands for "non-stable."

**Table S2.** Alternative dissociation channels (DC), the electron energies (E), electron energies with zero vibration corrections (E+ZPVE), enthalpies (dH), and Gibbs free energies, including entropic factors (dG), discussed in the manuscript [in Hartrees].

| DC no. | Product | Geometry                                                                            | DFT_Eel  | DFT_ZPVE | DFT_dH   | DFT_dG   | MP2_Eel  | MP2_ZPVE | MP2_dH   | MP2_dG   |
|--------|---------|-------------------------------------------------------------------------------------|----------|----------|----------|----------|----------|----------|----------|----------|
| 2B     | NO_k_S  |  | -129.532 | -129.527 | -129.523 | -129.546 | -129.247 | -129.242 | -129.239 | -129.261 |
|        | NO_k_T  |  | -129.298 | -129.294 | -129.291 | -129.315 | -128.933 | -128.926 | -128.923 | -128.947 |

|    |           |                                                                                     |          |          |          |          |          |          |          |          |
|----|-----------|-------------------------------------------------------------------------------------|----------|----------|----------|----------|----------|----------|----------|----------|
|    | H3C3_k1_S | 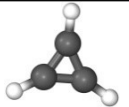    | -115.740 | -115.695 | -115.691 | -115.718 | -115.372 | -115.326 | -115.322 | -115.350 |
|    | H3C3_k1_T |  T | -115.592 | -115.556 | -115.552 | -115.582 | -115.212 | -115.160 | -115.155 | -115.185 |
|    | H3C3_k2_S |  S | -115.698 | -115.655 | -115.650 | -115.679 | -115.321 | -115.277 | -115.272 | -115.301 |
|    | H3C3_k2_T |    | -115.638 | -115.531 | -115.526 | -115.557 | -115.249 | -115.200 | -115.195 | -115.225 |
|    | H3C3_k4_S |    | -115.627 | -115.585 | -115.580 | -115.609 | -115.251 | -115.208 | -115.204 | -115.232 |
|    | H3C3_k4_T |    | -115.564 | -115.521 | -115.516 | -115.546 | -115.190 | -115.137 | -115.132 | -115.162 |
|    | H3C3_k7_S |   | -115.627 | -115.585 | -115.580 | -115.609 | -115.251 | -115.208 | -115.204 | -115.232 |
|    | H3C3_k7_T |  | -115.586 | -115.545 | -115.541 | -115.570 | ns       | -        | -        | -        |
| 3B | NO_k_S    |  | -129.532 | -129.527 | -129.523 | -129.546 | -        | -        | -        | -        |
|    | NO_k_T    |  | -129.298 | -129.294 | -129.291 | -129.315 | -        | -        | -        | -        |

|    |             |                                                                                     |          |          |          |          |          |          |          |          |
|----|-------------|-------------------------------------------------------------------------------------|----------|----------|----------|----------|----------|----------|----------|----------|
|    | 13C3H3_k4_S | 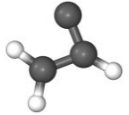    | -115.627 | -115.585 | -115.580 | -115.609 | -        | -        | -        | -        |
|    | 13C3H3_k1_T |  T | -115.592 | -115.556 | -115.552 | -115.582 | -        | -        | -        | -        |
|    | 2H3C3_k7_S  |    | -115.627 | -115.585 | -115.580 | -115.609 | -        | -        | -        | -        |
|    | 2H3C3_k1_S  |    | -115.740 | -115.695 | -115.691 | -115.718 | -        | -        | -        | -        |
| 4B | H2CN_k_T    |    | -93.535  | -93.507  | -93.507  | -93.533  | -        | -        | -        | -        |
|    | HC2O_k_S    |    | -151.526 | -151.508 | -151.504 | -151.531 | -        | -        | -        | -        |
| 5B | HCNO_k      |   | -168.188 | -168.169 | -168.165 | -168.188 | -167.732 | -167.700 | -167.695 | -167.721 |
|    | HCON_k      |                                                                                     | -168.165 | -168.146 | -168.142 | -168.170 | -        | -        | -        | -        |
|    | HCON_k2     |  | -168.165 | -168.146 | -168.142 | -168.170 | -        | -        | -        | -        |
|    | C2H2        |  | -76.926  | -76.902  | -76.898  | -76.919  | -        | -        | -        | -        |

k - denotes a cation, and the digit next to k is the number of successive geometry. S is a singlet, and T is a triplet. C - carbon, N - nitrogen, O - oxygen, H - hydrogen; "ns" stands for "non-stable."

**Table S3.** Distributions of partial charges and spin densities.

|             | partial charge distribution                                                         | partial charge distribution with hydrogens summed to carbon atoms                     | spin density distribution                                                           |
|-------------|-------------------------------------------------------------------------------------|---------------------------------------------------------------------------------------|-------------------------------------------------------------------------------------|
| Triplet DFT | 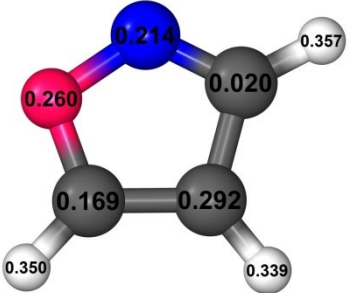   |    |  |
| Triplet MP2 |    |    |  |
| Singlet DFT |   |   |                                                                                     |
| Singlet MP2 |  |  |                                                                                     |

The XYZ-geometries for the transition states are enclosed in the following files:

1S\_TS\_O-N.xyz - represents the ring opening of N-O alone (and this is the true TS, with one imaginary frequency)

2\_TS\_C4-C5\_O-N\_no\_symm.xyz - O-N and C4-C5 simultaneous bond breaking

4\_TS\_C4-C5\_O-N\_C5-H.xyz - simultaneous breakage of O-N, C4-C5 and C5-H

5\_TS\_C3-C4\_O-N.xyz - simultaneous breakage of O-N and C3-C4
